# Supplementary material for: Pituitary–gonadal hormones associated with respiratory failure in men and women hospitalized with COVID-19: an observational cohort study
Source: PubMed Central journal article supplement — Endocr Connect. 2022 Dec 15;12(1):e220444. doi: 10.1530/EC-22-0444 (PMC9782448; doi:10.1530/ec-22-0444), 2022-12-15
Supplement: supplementary_table_1.pdf [file supplementary_table_1.pdf]

**Supplementary table 1:** Pituitary-gonadal levels in men and women hospitalized with COVID-19 by need of mechanical ventilation during hospitalization

|                                | Men                     |                             |              | Women                   |                             |              |
|--------------------------------|-------------------------|-----------------------------|--------------|-------------------------|-----------------------------|--------------|
|                                | Mechanically ventilated | Not mechanically ventilated | p-value      | Mechanically ventilated | Not mechanically ventilated | p-value      |
| Age, years (IQR)               | 72 (55-81)              | 66 (60-74)                  | 0.143        | 68 (60-74)              | 74 (65-83)                  | 0.337        |
| BMI, kg/m <sup>2</sup> (SD)    | 30.6 (6.7)              | 28.0 (4.6)                  | 0.113        | 31.7 (5.4)              | 28.9 (8.3)                  | 0.428        |
| Testosterone, nmol/L, (IQR)    | 1.3 (1.1-2.3)           | 3.6 (2.1-6.0)               | <b>0.001</b> | 0.4 (0.3-0.6)           | 0.5 (0.4-0.7)               | 0.186        |
| Estrone-sulfate, nmol/L, (IQR) | 4.9 (2.9-9.1)           | 2.1 (1.1-5.4)               | <b>0.010</b> | 2.9 (1.0-4.3)           | 1.9 (1.0-3.2)               | 0.589        |
| LH, IU/L (IQR)                 | 2.4 (1.8-2.8)           | 6.1 (4.0-9.0)               | <b>0.001</b> | 1.3 (0.8-3.7)           | 10.0 (3.1-23.9)             | <b>0.022</b> |
| FSH, IU/L (IQR)                | 1.3 (1.1-2.3)           | 5.3 (2.1-6.0)               | <b>0.001</b> | 7.4 (5.1-9.4)           | 28.2 (8.8-41.4)             | <b>0.029</b> |

Abbreviations: COVID-19: Coronavirus disease

ase 2019, BMI: Body-mass-index, LH: Leuteinizing hormone, FSH: Follicle stimulating hormone, IQR: Interquartile range, SD: Standard deviation
