# Supplementary material for: Pituitary–gonadal hormones associated with respiratory failure in men and women hospitalized with COVID-19: an observational cohort study
Source: PubMed Central journal article supplement — Endocr Connect. 2022 Dec 15;12(1):e220444. doi: 10.1530/EC-22-0444 (PMC9782448; doi:10.1530/ec-22-0444), 2022-12-15
Supplement: supplementary_table_2.pdf [file supplementary_table_2.pdf]

**Supplementary table 2:** Pituitary-gonadal levels in men and women hospitalized with bacterial CAP by 90-day vital status

|                                | Men           |                  |              | Women          |             |         |
|--------------------------------|---------------|------------------|--------------|----------------|-------------|---------|
|                                | Alive<br>n=39 | Dead<br>n=3      | p-value      | Alive<br>n=33  | Dead<br>n=1 | p-value |
| Age, years (IQR)               | 71 (65-80)    | 80 (76-82)       | 0.293        | 71 (59-86)     | 83          | 0.241   |
| BMI, kg/m <sup>2</sup> (SD)    | 26.2 (5.2)    | 28.4 (16.9)      | 0.625        | 24.7 (6.0)     | 21.5        | 0.604   |
| Testosterone, nmol/L, (IQR)    | 3.8 (2.2-6.6) | 5.1 (2.7-8.6)    | 0.751        | 0.4 (0.3-0.7)  | 0.9         | 0.241   |
| Estrone-sulfate, nmol/L, (IQR) | 3.0 (1.2-5.8) | 1.9 (1.2-8.9)    | 0.678        | 1.0 (0.4-4.9)  | 0.3         | 0.241   |
| LH, IU/L (IQR)                 | 4.2 (2.6-7.4) | 18.5 (10.1-26.4) | 0.294        | 9.2 (3.6-17.9) | 30.6        | 0.144   |
| FSH, IU/L (IQR)                | 4.1 (2.4-7.2) | 11.7 (9.1-18.2)  | <b>0.043</b> | 16 (5.6-31.2)  | 68.2        | 0.093   |

Abbreviations: CAP: Community-acquired pneumonia, BMI: Body-mass-index, LH: Leuteinizing hormone, FSH: Follicle stimulating hormone, IQR: Interquartile range, SD: Standard deviation

Community-acquired pneumonia, BMI: Body-mass-index, LH: Leuteinizing hormone, FSH: Follicle stimulating hormone, IQR: Interquartile range, SD: Standard deviation
